# Supplementary material for: Probing Interior Materials: An Examination of Sustainable Specification Procedures in Prototype Dwellings
Source: Royal Society of Chemistry journal article supplement (doi:10.1039/d0cp05892k), 2008-01-01
Supplement: d0cp05892k1.pdf [file d0cp05892k1.pdf]

**Supplementary information for “Pressure effects on the structures and electronic properties of halide perovskite CsPbX<sub>3</sub> (X=I, Br, Cl)”**

Xinyu Wang<sup>1,2</sup>, Hao Tian<sup>1,2</sup>, Xu Li<sup>1,2</sup>, Hai Sang<sup>1</sup>, Chonggui Zhong<sup>3</sup>, Jun-Ming Liu<sup>1, a)</sup>, Yurong Yang<sup>1,2,b)</sup>

<sup>1</sup>*Laboratory of Solid State Microstructures, Nanjing University, Nanjing 210093, China*

<sup>2</sup>*Jiangsu Key Laboratory of Artificial Functional Materials, Department of Materials Science and Engineering, Nanjing University, Nanjing 210093, China*

<sup>3</sup>*School of Sciences, Nantong University, Nantong, 226007, China*

---

<sup>a)</sup> Electronic mail: [liujm@nju.edu.cn](mailto:liujm@nju.edu.cn)

<sup>b)</sup> Electronic mail: [yangyr@nju.edu.cn](mailto:yangyr@nju.edu.cn)

As indicated in the manuscript, we carried out the phonon calculation for predicting the stability of pressure-induced structures. Here, we use a supercell approach as implemented in the PHONOPY code.<sup>1</sup> Figs. S1-S3 show the phonon-dispersion curves for different pressure-induced phases of CsPbX<sub>3</sub> (X=I, Br, Cl).

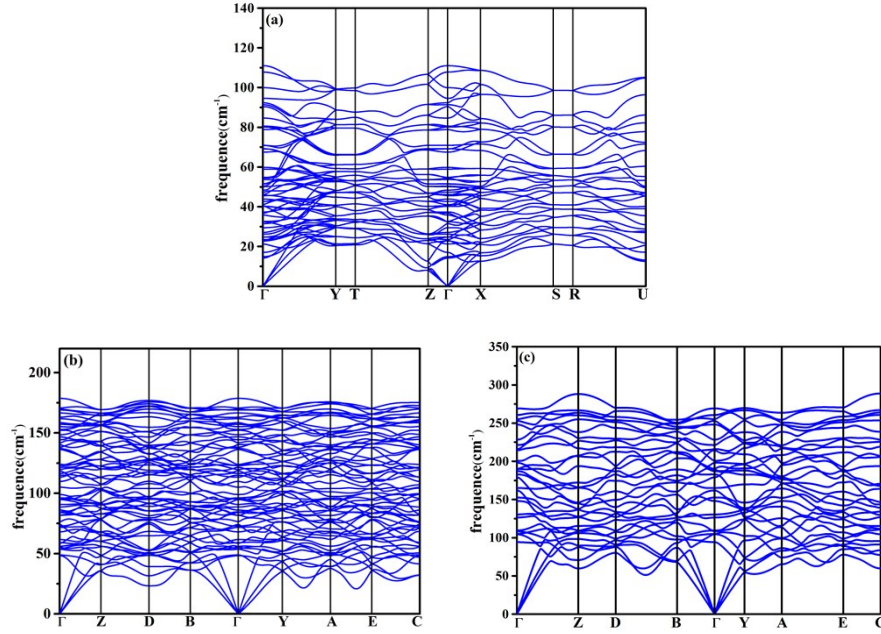

Fig. S1. Calculated phonon-dispersion curves for (a) non-Pv-*Pnma* (0 GPa), (b) *C2/m* I (20 GPa), (c) *C2/m* II (70 GPa) phases of CsPbI<sub>3</sub>

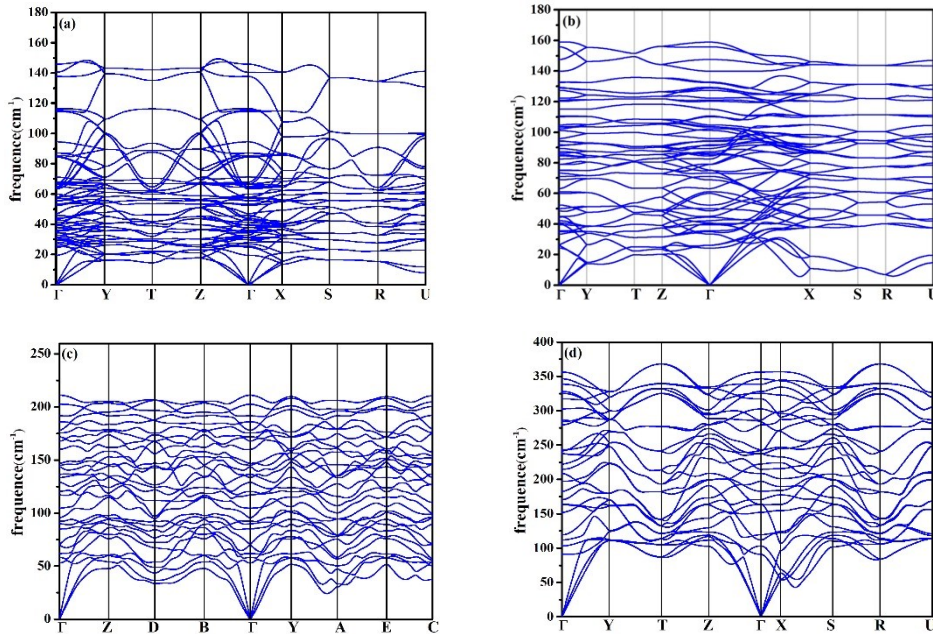

Fig. S2. Calculated phonon-dispersion curves for (a) Pv-*Pnma* (0 GPa), (b) non-Pv-*Pnma* (5 GPa), (c) *C2/m* I (20 GPa), (d) *Cmcm* (70 GPa) phases of CsPbBr<sub>3</sub>

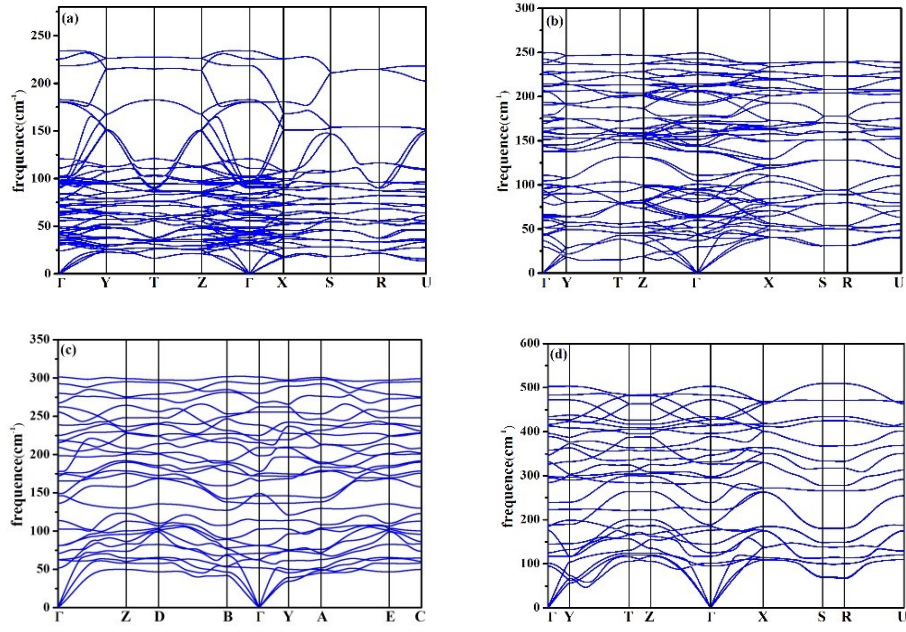

Fig. S3. Calculated phonon-dispersion curves for (a) Pv-*Pnma* (0 GPa), (b) non-Pv-*Pnma* (5 GPa), (c) *C2/m* I (20 GPa) , (d) *Cmcm* (70 GPa) phases of CsPbCl<sub>3</sub>

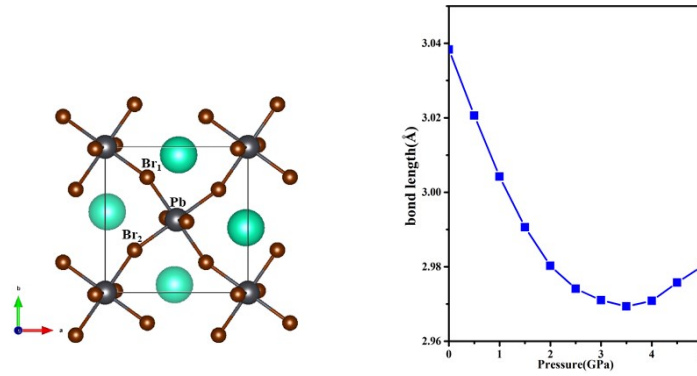

Fig. S4. The structure of CsPbI<sub>3</sub> Pv-*Pnma* phase (Right panel) and average of in-plane Br-Pb (Br<sub>1</sub>-Pb and Br<sub>2</sub>-Pb) bonds length (left panel).

1. A. Togo, F. Oba and I. Tanaka, *Phys. Rev. B*, 2008, **78**, 134106.
